# Supplementary material for: Assessment of Electrical Brain Activity of Healthy Volunteers Exposed to 3.5 GHz of 5G Signals within Environmental Levels: A Controlled–Randomised Study
Source: MDPI journal article supplement (doi:10.3390/ijerph20186793), 2023-09-21
Supplement: s1 [file s1]

## Supplementary Materials

Table S1. Volunteers' characteristics.

| Subjects<br>n°         | Code    | Sex<br>(F/M) | Age<br>(years) | Weight<br>(Kg) | Height<br>(cm) | Body Mass Index<br>(kg/m <sup>2</sup> ) |
|------------------------|---------|--------------|----------------|----------------|----------------|-----------------------------------------|
| 1                      | sub-S01 | M            | 22             | 70             | 178            | 22.09                                   |
| 2                      | sub-S02 | M            | 29             | 56             | 170            | 19.38                                   |
| 3                      | sub-S03 | M            | 23             | 84             | 167            | 30.12                                   |
| 4                      | sub-S04 | M            | 31             | 75             | 170            | 25.95                                   |
| 5                      | sub-S05 | M            | 26             | 70             | 178            | 22.09                                   |
| 6                      | sub-S06 | F            | 25             | 65             | 165            | 23.88                                   |
| 7                      | sub-S07 | M            | 30             | 89             | 173            | 29.74                                   |
| 8                      | sub-S08 | M            | 29             | 63             | 183            | 18.81                                   |
| 9                      | sub-S09 | M            | 34             | 95             | 193            | 25.50                                   |
| 10                     | sub-S10 | F            | 25             | 67             | 178            | 21.15                                   |
| 11                     | sub-S11 | M            | 35             | 88             | 187            | 25.17                                   |
| 12                     | sub-S12 | M            | 18             | 72             | 185            | 21.04                                   |
| 13                     | sub-S13 | M            | 25             | 70             | 172            | 23.66                                   |
| 14                     | sub-S14 | F            | 21             | 55             | 171            | 18.81                                   |
| 15                     | sub-S15 | M            | 30             | 64             | 183            | 19.11                                   |
| 16                     | sub-S16 | M            | 18             | 77             | 186            | 22.26                                   |
| 17                     | sub-S17 | F            | 25             | 50             | 157            | 20.28                                   |
| 18                     | sub-S18 | M            | 34             | 88             | 168            | 31.18                                   |
| 19                     | sub-S19 | M            | 31             | 65             | 175            | 21.22                                   |
| 20                     | sub-S20 | M            | 30             | 83             | 185            | 24.25                                   |
| 21                     | sub-S21 | F            | 34             | 56             | 159            | 22.15                                   |
| 22                     | sub-S22 | F            | 23             | 61             | 159            | 24.13                                   |
| 23                     | sub-S23 | M            | 20             | 64             | 174            | 21.14                                   |
| 24                     | sub-S24 | F            | 26             | 54             | 165            | 19.83                                   |
| 25                     | sub-S25 | F            | 28             | 65             | 163            | 24.46                                   |
| 26                     | sub-S26 | F            | 32             | 50             | 164            | 18.59                                   |
| 27                     | sub-S27 | F            | 22             | 52             | 170            | 17.99                                   |
| 28                     | sub-S28 | F            | 31             | 53             | 169            | 18.56                                   |
| 29                     | sub-S29 | F            | 25             | 53             | 167            | 19.00                                   |
| 30                     | sub-S30 | F            | 26             | 65             | 160            | 25.39                                   |
| 31                     | sub-S31 | F            | 21             | 95             | 166            | 34.48                                   |
| 32                     | sub-S32 | F            | 24             | 58             | 148            | 26.48                                   |
| 33                     | sub-S33 | F            | 24             | 60             | 157            | 24.34                                   |
| 34                     | sub-S34 | F            | 27             | 80             | 168            | 28.34                                   |
| Mean                   |         |              | 26.59          | 68.00          | 170.97         | 23.25                                   |
| Standard deviation     |         |              | 4.67           | 13.25          | 10.18          | 4.06                                    |
| Standard error of mean |         |              | 0.80           | 2.27           | 1.75           | 0.70                                    |
